# Supplementary material for: Poly-γ-Glutamic Acid Nanoparticles Based Visible Light-Curable Hydrogel for Biomedical Application
Source: Hindawi journal article supplement (doi:10.1155/2016/7350516), 2016-01-01

**Supporting Information for**

**Poly-γ-glutamic acid-nanoparticles based visible light-curable hydrogel for biomedical application**

József Bakó1, Farkas Kerényi1, Edit Hrubi1, István Varga2, Lajos Daróczi3, Beatrix Dienes4, László Csernoch4, József Gáll5 and Csaba Hegedűs1


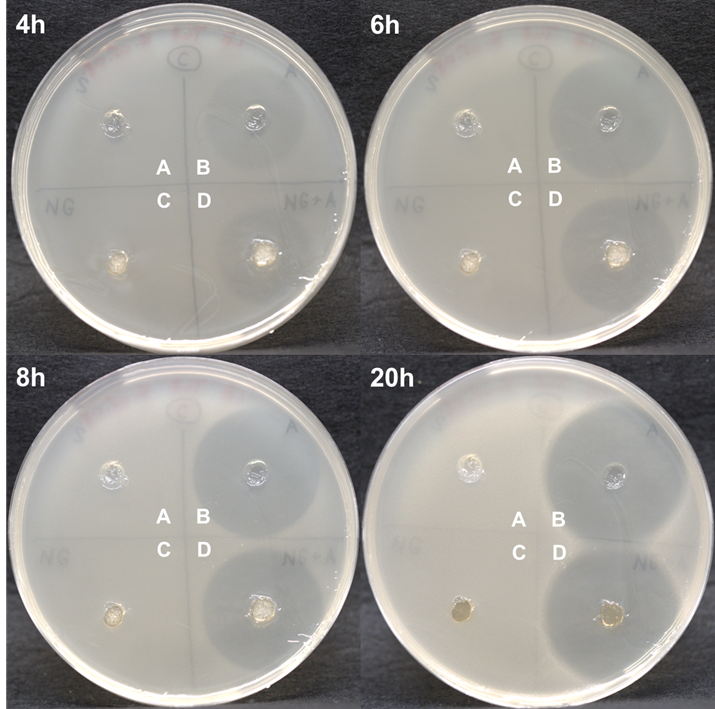


Figure S1: The effect of the antibiotic ampicillin in different forms: A: saline solution, B: Ampicillin solution, C: PGA-nanogel without Ampicillin, D: PGA-nanogel with Ampicillin on E. coli ER2738 bacteria.

Table S1: The areas of the plaques.


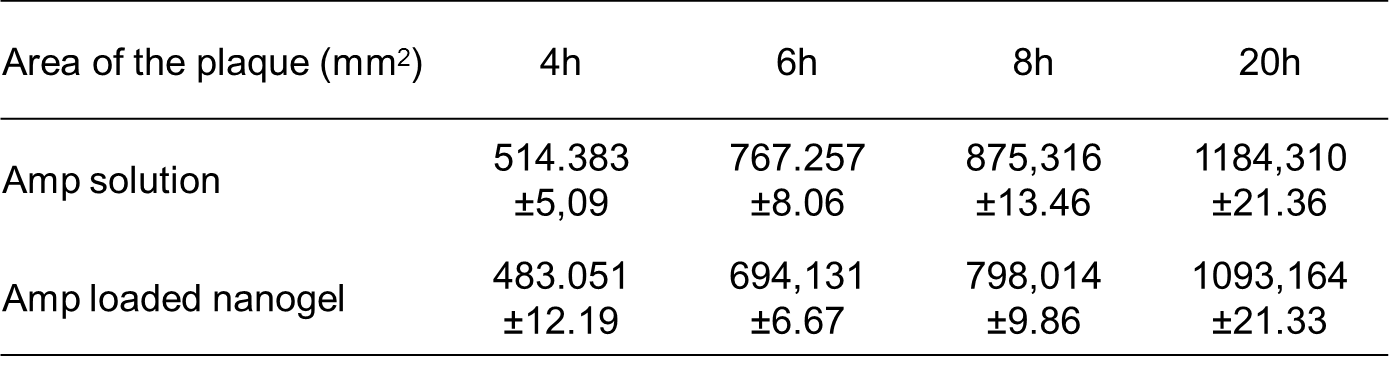

Supplement: f1 [file 7350516.f1.docx]
